# Supplementary material for: Assessment of Metagenomic Assembly Using Simulated Next Generation Sequencing Data
Source: PLoS One. 2012 Feb 23;7(2):e31386. doi: 10.1371/journal.pone.0031386 (PMC3285633; doi:10.1371/journal.pone.0031386)
Supplement: Table S2 — Genomes Used in the Medium Complexity Metagenome and Estimated Coverage (100 genomes). (XLS) [file pone.0031386.s002.xls]

## Sheet: 100 species
Supplemental Table 2 - Genomes Used in the Medium Complexity Metagenome and Estimated Coverage (100 genomes)
Rank	Chomosome	Chromosome	Name	phylogenetic group	genome size (Mb) 1	GC %	abundance 2	Percent Relative Abundance	Est_proportion of total sequence		Estimated coverage for 454	Estimated coverage for Sanger	Estimated coverage for Illumina
1	NC_007969	0	Psychrobacter cryohalolentis K5	Gammaproteobacteria	3.1	42.2	1000	2.22768	1.86278		1.50224	1.20179	17.8466
2	NC_009077	0	Mycobacterium sp. JLS	Actinobacteria	6	68.4	794.311	1.76947	2.86379		1.19325	0.954598	14.1758
3	NC_007604	0	Synechococcus elongatus PCC 7942	Cyanobacteria	2.75	55.4	707.107	1.57521	1.16847		1.06225	0.849797	12.6195
4	NC_004722	0	Bacillus cereus ATCC 14579	Firmicutes	5.42	35.3	656.26	1.46194	2.13735		0.985861	0.788689	11.712
5	NC_002662	0	Lactococcus lactis subsp. lactis Il1403	Firmicutes	2.4	35.3	621.975	1.38556	0.896983		0.934357	0.747486	11.1002
6	NC_004344	0	Wigglesworthia glossinidia endosymbiont of Glossina brevipalpis	Gammaproteobacteria	0.7	22.5	596.831	1.32955	0.251044		0.896585	0.717268	10.6514
7	AC_000091	0	Escherichia coli str. K12 substr. W3110	Gammaproteobacteria	4.65	50.8	577.35	1.28615	1.61322		0.86732	0.693856	10.3038
8	NC_010501	0	Pseudomonas putida W619	Gammaproteobacteria	5.8	61.4	561.663	1.25121	1.95751		0.843754	0.675003	10.0238
9	NC_003098	0	Streptococcus pneumoniae R6	Firmicutes	2.04	39.7	548.662	1.22225	0.672566		0.824224	0.659379	9.79178
10	NC_002927	0	Bordetella bronchiseptica RB50	Betaproteobacteria	5.3	68.1	537.647	1.19771	1.71228		0.807677	0.646142	9.5952
11	NC_008529	0	Lactobacillus delbrueckii subsp. bulgaricus ATCC BAA-365	Firmicutes	1.9	49.7	528.15	1.17655	0.602992		0.79341	0.634728	9.42572
12	NC_008593	0	Clostridium novyi NT	Firmicutes	2.5	28.9	519.844	1.15805	0.780933		0.780933	0.624746	9.27748
13	NC_009632	0	Staphylococcus aureus subsp. aureus JH1	Firmicutes	2.93	32.9	512.493	1.14167	0.902311		0.76989	0.615912	9.14629
14	NC_006156	0	Borrelia garinii PBi	Spirochaetes	0.98	28.1	505.923	1.12704	0.297928		0.760019	0.608015	9.02903
15	NC_010102	0	Salmonella enterica subsp. enterica serovar Paratyphi B str. SPB7	Gammaproteobacteria	4.9	52.1	500	1.11384	1.4722		0.751121	0.600897	8.92332
16	NC_010694	0	Erwinia tasmaniensis	Gammaproteobacteria	4.08	53.4	494.622	1.10186	1.21264		0.743042	0.594433	8.82734
17	NC_003923	0	Staphylococcus aureus subsp. aureus MW2	Firmicutes	2.8	32.8	489.707	1.09091	0.823937		0.735658	0.588527	8.73962
18	NC_007404	0	Thiobacillus denitrificans ATCC 25259	Betaproteobacteria	2.91	66.1	485.19	1.08085	0.848408		0.728873	0.583098	8.65901
19	NC_008435	0	Rhodopseudomonas palustris BisA53	Alphaproteobacteria	5.51	64.4	481.018	1.07156	1.59262		0.722606	0.578085	8.58456
20	NC_003997	0	Bacillus anthracis str. Ames	Firmicutes	5.23	35.4	477.148	1.06293	1.49953		0.716792	0.573434	8.51549
21	NC_004116	0	Streptococcus agalactiae 2603V/R	Firmicutes	2.2	35.6	473.544	1.05491	0.626013		0.711378	0.569102	8.45117
22	NC_010622	NC_010623	Burkholderia phymatum STM815	Betaproteobacteria	8.7	62.3	470.175	1.0474	2.45798		0.706317	0.565054	8.39105
23	NC_009802	0	Campylobacter concisus 13826	Epsilonproteobacteria	2.15	39.3	467.016	1.04036	0.603352		0.701572	0.561258	8.33468
24	NC_009633	0	Alkaliphilus metalliredigens QYMF	Firmicutes	4.9	36.8	464.046	1.03375	1.36633		0.697109	0.557687	8.28166
25	NC_004369	0	Corynebacterium efficiens YS-314	Actinobacteria	3.15	63.1	461.244	1.02751	0.873055		0.692901	0.55432	8.23166
26	NC_007297	0	Streptococcus pyogenes MGAS5005	Firmicutes	1.84	38.5	458.596	1.02161	0.507047		0.688922	0.551138	8.18439
27	NC_009667	NC_009668	Ochrobactrum anthropi ATCC 49188	Alphaproteobacteria	5.22	56.1	456.086	1.01602	1.4306		0.685152	0.548122	8.13961
28	NC_005071	0	Prochlorococcus marinus str. MIT 9313	Cyanobacteria	2.41	50.7	453.703	1.01071	0.657036		0.681573	0.545258	8.09709
29	NC_005296	0	Rhodopseudomonas palustris CGA009	Alphaproteobacteria	5.47	65	451.437	1.00566	1.48383		0.678168	0.542534	8.05663
30	NC_010545	0	Corynebacterium urealyticum DSM 7109	Actinobacteria	2.37	64.2	449.276	1.00085	0.639826		0.674922	0.539938	8.01807
31	NC_006461	0	Thermus thermophilus HB8	Deinococcus-Thermus	2.07	69.5	447.214	0.996251	0.55627		0.671823	0.537459	7.98126
32	NC_010400	0	Acinetobacter baumannii SDF	Gammaproteobacteria	3.45	39.1	445.241	0.991857	0.923028		0.668861	0.535089	7.94607
33	NC_002946	0	Neisseria gonorrhoeae FA 1090	Betaproteobacteria	2.15	52.7	443.353	0.98765	0.57278		0.666023	0.532819	7.91236
34	NC_000913	0	Escherichia coli str. K12 substr. MG1655	Gammaproteobacteria	4.6	50.8	441.542	0.983615	1.22048		0.663303	0.530642	7.88004
35	NC_008358	0	Hyphomonas neptunium ATCC 15444	Alphaproteobacteria	3.71	61.9	439.803	0.979741	0.980465		0.66069	0.528552	7.849
36	NC_009641	0	Staphylococcus aureus subsp. aureus str. Newman	Firmicutes	2.9	32.9	438.131	0.976017	0.763488		0.658179	0.526543	7.81917
37	NC_008212	0	Haloquadratum walsbyi DSM 16790	Euryarchaeota	3.18	47.9	436.522	0.972433	0.834129		0.655762	0.52461	7.79045
38	NC_008819	0	Prochlorococcus marinus str. NATL1A	Cyanobacteria	1.9	35	434.972	0.968979	0.496609		0.653433	0.522747	7.76279
39	NC_009617	0	Clostridium beijerinckii NCIMB 8052	Firmicutes	6	29.9	433.476	0.965648	1.56285		0.651187	0.52095	7.7361
40	NC_005085	0	Chromobacterium violaceum ATCC 12472	Betaproteobacteria	4.8	64.8	432.033	0.962433	1.24612		0.649018	0.519215	7.71034
41	NC_010280	0	Chlamydia trachomatis L2b/UCH-1/proctitis	Chlamydiae/Verrucomicrobia	1	41.3	430.638	0.959325	0.258769		0.646923	0.517538	7.68544
42	NC_008255	0	Cytophaga hutchinsonii ATCC 33406	Bacteroidetes/Chlorobi	4.4	38.8	429.289	0.95632	1.13502		0.644896	0.515917	7.66136
43	NC_008340	0	Alkalilimnicola ehrlichei MLHE-1	Gammaproteobacteria	3.3	67.5	427.983	0.95341	0.848673		0.642934	0.514347	7.63806
44	NC_008600	0	Bacillus thuringiensis str. Al Hakam	Firmicutes	5.36	35.4	426.718	0.950592	1.37438		0.641033	0.512827	7.61548
45	NC_010516	0	Clostridium botulinum B1 str. Okra	Firmicutes	4.15	28.2	425.491	0.947859	1.06106		0.639191	0.511353	7.59359
46	NC_009637	0	Methanococcus maripaludis C7	Euryarchaeota	1.8	33.3	424.301	0.945208	0.45893		0.637403	0.509923	7.57235
47	NC_007712	0	Sodalis glossinidius str. 'morsitans'	Gammaproteobacteria	4.29	54.5	423.146	0.942635	1.09081		0.635668	0.508534	7.55173
48	NC_010546	NC_010547	Cyanothece sp. ATCC 51142	Cyanobacteria	5.43	37.9	422.023	0.940134	1.37701		0.633981	0.507185	7.5317
49	NC_008527	0	Lactococcus lactis subsp. cremoris SK11	Firmicutes	2.56	35.8	420.932	0.937704	0.647518		0.632342	0.505874	7.51223
50	NC_008309	0	Haemophilus somnus 129PT	Gammaproteobacteria	2.01	37.2	419.871	0.935339	0.507121		0.630748	0.504598	7.49328
51	NC_009012	0	Clostridium thermocellum ATCC 27405	Firmicutes	3.8	39	418.838	0.933038	0.956378		0.629196	0.503357	7.47485
52	NC_003112	0	Neisseria meningitidis MC58	Betaproteobacteria	2.3	51.5	417.832	0.930797	0.57747		0.627685	0.502148	7.4569
53	NC_009776	0	Ignicoccus hospitalis KIN4/I	Crenarchaeota	1.3	56.5	416.852	0.928614	0.325631		0.626213	0.50097	7.4394
54	NC_007512	0	Pelodictyon luteolum DSM 273	Bacteroidetes/Chlorobi	2.36	57.3	415.896	0.926485	0.58979		0.624777	0.499822	7.42235
55	NC_009801	0	Escherichia coli E24377A	Gammaproteobacteria	5.27	50.6	414.964	0.924409	1.31408		0.623377	0.498702	7.40572
56	NC_009616	0	Thermosipho melanesiensis BI429	Thermotogae	1.9	31.4	414.055	0.922384	0.472729		0.622011	0.497609	7.38949
57	NC_008011	0	Lawsonia intracellularis PHE/MN1-00	Deltaproteobacteria	1.76	33.1	413.167	0.920406	0.436957		0.620678	0.496542	7.37365
58	NC_002971	0	Coxiella burnetii RSA 493	Gammaproteobacteria	2.03	42.6	412.3	0.918475	0.502933		0.619375	0.4955	7.35818
59	NC_003143	0	Yersinia pestis CO92	Gammaproteobacteria	4.88	47.6	411.453	0.916588	1.20654		0.618103	0.494482	7.34306
60	NC_006274	0	Bacillus cereus E33L	Firmicutes	5.85	35.1	410.625	0.914743	1.44345		0.616859	0.493487	7.32828
61	NC_007292	0	Candidatus Blochmannia pennsylvanicus str. BPEN	Gammaproteobacteria	0.79	29.6	409.816	0.912939	0.194543		0.615643	0.492514	7.31383
62	NC_006512	0	Idiomarina loihiensis L2TR	Gammaproteobacteria	2.84	47	409.023	0.911175	0.698018		0.614453	0.491562	7.2997
63	NC_008346	0	Syntrophomonas wolfei subsp. wolfei str. Goettingen	Other Bacteria	2.94	44.9	408.248	0.909448	0.721227		0.613288	0.49063	7.28586
64	NC_003909	0	Bacillus cereus ATCC 10987	Firmicutes	5.43	35.5	407.489	0.907758	1.32959		0.612148	0.489719	7.27232
65	NC_008563	0	Escherichia coli APEC O1	Gammaproteobacteria	5.51	50.3	406.746	0.906102	1.34671		0.611032	0.488825	7.25906
66	NC_009565	0	Mycobacterium tuberculosis F11	Actinobacteria	4.4	65.6	406.018	0.90448	1.07349		0.609938	0.487951	7.24606
67	NC_006582	0	Bacillus clausii KSM-K16	Firmicutes	4.3	44.8	405.305	0.902891	1.04725		0.608866	0.487093	7.23333
68	NC_007929	0	Lactobacillus salivarius UCC118	Firmicutes	2.1	33	404.606	0.901333	0.510565		0.607816	0.486253	7.22085
69	NC_002945	0	Mycobacterium bovis AF2122/97	Actinobacteria	4.35	65.6	403.92	0.899806	1.05581		0.606786	0.485429	7.20861
70	NC_010628	0	Nostoc punctiforme PCC 73102	Cyanobacteria	9.01	41.4	403.247	0.898307	2.18321		0.605775	0.48462	7.19661
71	NC_008322	0	Shewanella sp. MR-7	Gammaproteobacteria	4.8	47.9	402.587	0.896837	1.16119		0.604784	0.483827	7.18483
72	NC_009074	NC_009075	Burkholderia pseudomallei 668	Betaproteobacteria	7	68.3	401.94	0.895394	1.69067		0.603811	0.483049	7.17327
73	NC_000963	0	Rickettsia prowazekii str. Madrid E	Alphaproteobacteria	1.11	29	401.304	0.893978	0.267668		0.602856	0.482285	7.16193
74	NC_000907	0	Haemophilus influenzae Rd KW20	Gammaproteobacteria	1.8	38.1	400.68	0.892587	0.433381		0.601918	0.481534	7.15079
75	NC_009434	0	Pseudomonas stutzeri A1501	Gammaproteobacteria	4.6	63.9	400.066	0.891221	1.10583		0.600997	0.480797	7.13984
76	NC_002967	0	Treponema denticola ATCC 35405	Spirochaetes	2.8	37.9	399.464	0.889879	0.672103		0.600092	0.480073	7.12909
77	NC_005241	0	Ralstonia eutropha H16	Betaproteobacteria	7	66.3	398.872	0.888561	1.67777		0.599203	0.479362	7.11853
78	NC_002944	0	Mycobacterium avium subsp. paratuberculosis K-10	Actinobacteria	4.8	69.3	398.29	0.887264	1.14879		0.598328	0.478663	7.10814
79	NC_008555	0	Listeria welshimeri serovar 6b str. SLCC5334	Firmicutes	2.8	36.4	397.718	0.88599	0.669165		0.597469	0.477975	7.09793
80	NC_002570	0	Bacillus halodurans C-125	Firmicutes	4.2	43.7	397.155	0.884737	1.00233		0.596624	0.477299	7.08789
81	NC_008268	0	Rhodococcus sp. RHA1	Actinobacteria	9.67	67	396.602	0.883504	2.30453		0.595793	0.476634	7.07802
82	NC_002939	0	Geobacter sulfurreducens PCA	Deltaproteobacteria	3.81	60.9	396.058	0.882292	0.906742		0.594975	0.47598	7.0683
83	NC_000922	0	Chlamydophila pneumoniae CWL029	Chlamydiae/Verrucomicrobia	1.2	40.6	395.522	0.881098	0.285202		0.59417	0.475336	7.05874
84	NC_008245	0	Francisella tularensis subsp. tularensis FSC198	Gammaproteobacteria	1.9	32.3	394.995	0.879924	0.450968		0.593378	0.474703	7.04934
85	NC_007795	0	Staphylococcus aureus subsp. aureus NCTC 8325	Firmicutes	2.8	32.9	394.476	0.878768	0.663711		0.592599	0.474079	7.04008
86	NC_010612	0	Mycobacterium marinum M	Actinobacteria	6.62	65.7	393.965	0.87763	1.56717		0.591831	0.473465	7.03096
87	NC_000964	0	Bacillus subtilis subsp. subtilis str. 168	Firmicutes	4.2	43.5	393.462	0.876509	0.993007		0.591076	0.47286	7.02198
88	NC_002952	0	Staphylococcus aureus subsp. aureus MRSA252	Firmicutes	2.9	32.8	392.966	0.875405	0.684784		0.590331	0.472265	7.01313
89	NC_003047	0	Sinorhizobium meliloti 1021	Alphaproteobacteria	6.74	62.2	392.478	0.874318	1.58956		0.589598	0.471678	7.00442
90	NC_004070	0	Streptococcus pyogenes MGAS315	Firmicutes	1.9	38.6	391.997	0.873246	0.447545		0.588875	0.4711	6.99584
91	NC_002162	0	Ureaplasma parvum serovar 3 str. ATCC 700970	Firmicutes	0.75	25.5	391.523	0.87219	0.176449		0.588163	0.47053	6.98738
92	NC_003361	0	Chlamydophila caviae GPIC	Chlamydiae/Verrucomicrobia	1.18	39.2	391.056	0.871149	0.277282		0.587461	0.469969	6.97904
93	NC_007413	0	Anabaena variabilis ATCC 29413	Cyanobacteria	7.07	41.4	390.596	0.870123	1.65938		0.586769	0.469416	6.97082
94	NC_008709	0	Psychromonas ingrahamii 37	Gammaproteobacteria	4.6	40.1	390.141	0.869112	1.0784		0.586087	0.46887	6.96272
95	NC_006576	0	Synechococcus elongatus PCC 6301	Cyanobacteria	2.7	55.5	389.694	0.868114	0.632248		0.585415	0.468332	6.95473
96	NC_009972	0	Herpetosiphon aurantiacus ATCC 23779	Chloroflexi	6.74	50.9	389.252	0.867131	1.57649		0.584751	0.467801	6.94684
97	NC_004663	0	Bacteroides thetaiotaomicron VPI-5482	Bacteroidetes/Chlorobi	6.33	42.9	388.816	0.86616	1.47893		0.584097	0.467277	6.93907
98	NC_008513	0	Buchnera aphidicola str. Cc (Cinara cedri)	Gammaproteobacteria	0.42	20.1	388.387	0.865203	0.0980198		0.583451	0.466761	6.9314
99	NC_009782	0	Staphylococcus aureus subsp. aureus Mu3	Firmicutes	2.9	32.9	387.963	0.864258	0.676064		0.582814	0.466251	6.92383
100	NC_008510	NC_008511	Leptospira borgpetersenii serovar Hardjo-bovis JB197	Spirochaetes	3.9	40.2	387.544	0.863326	0.908209		0.582186	0.465748	6.91636
				Total Genome Length (Mb)	371.73		44889.7	100	100
				Total Read Length (Mb)	200
				Total Number Reads
					371.73
1	genome size = total of all chromosomes and plasmids			average	74.34	40.4167
2	calculated using ni = a(log(i + 1))-b for 1 > i > M, and b=0.5
	The parameter a represents the abundance of the most abundant genotype, b is a parameter related to the evenness, and M is the number of different genotypes in the community.
