# Supplementary material for: Assessment of Metagenomic Assembly Using Simulated Next Generation Sequencing Data
Source: PLoS One. 2012 Feb 23;7(2):e31386. doi: 10.1371/journal.pone.0031386 (PMC3285633; doi:10.1371/journal.pone.0031386)
Supplement: Table S3 — Genomes Used in the High Complexity Metagenome and Estimated Coverage (400 genomes). (XLS) [file pone.0031386.s003.xls]

## Sheet: 400 species
Supplemental Table 3 - Genomes Used in the High Complexity Metagenome and Estimated Coverage (400 genomes)
Rank	Chromosome	Chromosome	Name	phylogenetic group	genome size (Mb) 1	GC %	abundance 2	Percent Relative Abundance	Est_proportion of total sequence		Estimated coverage for 454	Estimated coverage for Sanger	Estimated coverage for Illumina
1	NC_009675	0	Anaeromyxobacter sp. Fw109-5	Deltaproteobacteria	5.3	73.5	1000	0.658002	0.963023		0.454256	0.363405	5.39657
2	NC_008347	0	Maricaulis maris MCS10	Alphaproteobacteria	3.37	62.7	794.311	0.522658	0.486386		0.360821	0.288657	4.28655
3	NC_009441	0	Flavobacterium johnsoniae UW101	Bacteroidetes/Chlorobi	6.1	34.1	707.107	0.465277	0.783747		0.321208	0.256966	3.81595
4	NC_007294	0	Mycoplasma synoviae 53	Firmicutes	0.8	28.5	656.26	0.43182	0.0953952		0.29811	0.238488	3.54155
5	NC_007798	0	Neorickettsia sennetsu str. Miyayama	Alphaproteobacteria	0.86	41.1	621.975	0.409261	0.0971924		0.282536	0.226029	3.35653
6	NC_006142	0	Rickettsia typhi str. Wilmington	Alphaproteobacteria	1.11	28.9	596.831	0.392716	0.120375		0.271114	0.216891	3.22084
7	NC_002947	0	Pseudomonas putida KT2440	Gammaproteobacteria	6.18	61.5	577.35	0.379897	0.648319		0.262265	0.209812	3.11571
8	NC_010337	0	Heliobacterium modesticaldum Ice1	Firmicutes	3.1	57	561.663	0.369575	0.316372		0.255139	0.204111	3.03105
9	NC_010503	0	Ureaplasma parvum serovar 3 str. ATCC 27815	Firmicutes	0.75	25.5	548.662	0.361021	0.07477		0.249233	0.199387	2.96089
10	NC_003911	0	Silicibacter pomeroyi DSS-3	Alphaproteobacteria	4.6	64.1	537.647	0.353773	0.449383		0.24423	0.195384	2.90145
11	NC_008705	0	Mycobacterium sp. KMS	Actinobacteria	6.22	68.2	528.15	0.347524	0.59691		0.239916	0.191933	2.8502
12	NC_003272	0	Nostoc sp. PCC 7120	Cyanobacteria	7.21	41.3	519.844	0.342058	0.681035		0.236143	0.188914	2.80537
13	NC_005027	0	Rhodopirellula baltica SH 1	Planctomycetes	7.1	55.4	512.493	0.337222	0.661162		0.232803	0.186243	2.7657
14	NC_009073	0	Pyrobaculum calidifontis JCM 11548	Crenarchaeota	2	57.2	505.923	0.332898	0.183855		0.229819	0.183855	2.73025
15	NC_007181	0	Sulfolobus acidocaldarius DSM 639	Crenarchaeota	2.23	36.7	500	0.329001	0.202598		0.227128	0.181703	2.69828
16	NC_007347	NC_007348	Ralstonia eutropha JMP134	Betaproteobacteria	7.26	64.4	494.622	0.325462	0.652485		0.224685	0.179748	2.66926
17	NC_009881	0	Rickettsia akari str. Hartford	Alphaproteobacteria	1.2	32.3	489.707	0.322228	0.106777		0.222452	0.177962	2.64273
18	NC_008699	0	Nocardioides sp. JS614	Actinobacteria	5.31	71.4	485.19	0.319256	0.468131		0.2204	0.17632	2.61836
19	NC_007606	0	Shigella dysenteriae Sd197	Gammaproteobacteria	4.59	51	481.018	0.316511	0.401176		0.218505	0.174804	2.59584
20	NC_007434	NC_007435	Burkholderia pseudomallei 1710b	Betaproteobacteria	7.31	68	477.148	0.313964	0.63377		0.216748	0.173398	2.57496
21	NC_003551	0	Methanopyrus kandleri AV19	Euryarchaeota	1.69	61.2	473.544	0.311593	0.145415		0.21511	0.172088	2.55551
22	NC_009943	0	Desulfococcus oleovorans Hxd3	Deltaproteobacteria	3.9	56.2	470.175	0.309376	0.333185		0.21358	0.170864	2.53733
23	NC_009434	0	Pseudomonas stutzeri A1501	Gammaproteobacteria	4.6	63.9	467.016	0.307298	0.390347		0.212145	0.169716	2.52028
24	NC_008229	0	Helicobacter acinonychis str. Sheeba	Epsilonproteobacteria	1.6	38.2	464.046	0.305343	0.134909		0.210796	0.168637	2.50425
25	NC_009485	0	Bradyrhizobium sp. BTAi1	Alphaproteobacteria	8.53	64.8	461.244	0.303499	0.714893		0.209523	0.167618	2.48913
26	NC_010610	0	Lactobacillus fermentum IFO 3956	Firmicutes	2.1	51.5	458.596	0.301757	0.174989		0.20832	0.166656	2.47484
27	NC_008528	0	Oenococcus oeni PSU-1	Firmicutes	1.8	37.9	456.086	0.300105	0.14917		0.20718	0.165744	2.4613
28	NC_004567	0	Lactobacillus plantarum WCFS1	Firmicutes	3.34	44.4	453.703	0.298538	0.275346		0.206098	0.164878	2.44844
29	NC_008531	0	Leuconostoc mesenteroides subsp. mesenteroides ATCC 8293	Firmicutes	2.04	37.7	451.437	0.297046	0.167335		0.205068	0.164054	2.43621
30	NC_009464	0	uncultured methanogenic archaeon RC-I	Euryarchaeota	3.2	54.6	449.276	0.295624	0.261231		0.204087	0.163269	2.42455
31	NC_007793	0	Staphylococcus aureus subsp. aureus USA300	Firmicutes	2.94	32.7	447.214	0.294267	0.238904		0.20315	0.16252	2.41342
32	NC_010002	0	Delftia acidovorans SPH-1	Betaproteobacteria	6.8	66.5	445.241	0.29297	0.55013		0.202254	0.161803	2.40277
33	NC_007633	0	Mycoplasma capricolum subsp. capricolum ATCC 27343	Firmicutes	1.01	23.8	443.353	0.291727	0.0813639		0.201396	0.161117	2.39258
34	NC_008740	0	Marinobacter aquaeolei VT8	Gammaproteobacteria	4.75	56.9	441.542	0.290535	0.381089		0.200573	0.160458	2.38281
35	NC_008711	0	Arthrobacter aurescens TC1	Actinobacteria	5.23	62.4	439.803	0.289391	0.417946		0.199783	0.159827	2.37342
36	NC_010612	0	Mycobacterium marinum M	Actinobacteria	6.62	65.7	438.131	0.288291	0.527015		0.199024	0.159219	2.3644
37	NC_006274	0	Bacillus cereus E33L	Firmicutes	5.85	35.1	436.522	0.287232	0.464005		0.198293	0.158634	2.35572
38	NC_009053	0	Actinobacillus pleuropneumoniae L20	Gammaproteobacteria	2.3	41.3	434.972	0.286212	0.181782		0.197589	0.158071	2.34735
39	NC_010103	NC_010104	Brucella canis ATCC 23365	Alphaproteobacteria	3.3	57.2	433.476	0.285228	0.25992		0.196909	0.157528	2.33928
40	NC_006908	0	Mycoplasma mobile 163K	Firmicutes	0.78	25	432.033	0.284278	0.0612311		0.196254	0.157003	2.33149
41	NC_007799	0	Ehrlichia chaffeensis str. Arkansas	Alphaproteobacteria	1.18	30.1	430.638	0.28336	0.0923326		0.19562	0.156496	2.32397
42	NC_009953	0	Salinispora arenicola CNS-205	Actinobacteria	5.8	69.5	429.289	0.282473	0.452417		0.195007	0.156006	2.31668
43	NC_008700	0	Shewanella amazonensis SB2B	Gammaproteobacteria	4.3	53.6	427.983	0.281613	0.334392		0.194414	0.155531	2.30964
44	NC_010528	NC_010530	Cupriavidus taiwanensis	Betaproteobacteria	6.46	67	426.718	0.280781	0.50088		0.193839	0.155071	2.30281
45	NC_006832	0	Ehrlichia ruminantium str. Welgevonden	Alphaproteobacteria	1.51	27.5	425.491	0.279974	0.116742		0.193282	0.154626	2.29619
46	NC_010546	NC_010547	Cyanothece sp. ATCC 51142	Cyanobacteria	5.43	37.9	424.301	0.279191	0.418634		0.192741	0.154193	2.28977
47	NC_008228	0	Pseudoalteromonas atlantica T6c	Gammaproteobacteria	5.19	44.6	423.146	0.278431	0.399042		0.192217	0.153773	2.28353
48	NC_010475	0	Synechococcus sp. PCC 7002	Cyanobacteria	3.4	49.2	422.023	0.277692	0.260721		0.191707	0.153365	2.27748
49	NC_000918	0	Aquifex aeolicus VF5	Aquificae	1.59	43.3	420.932	0.276974	0.12161		0.191211	0.152969	2.27159
50	NC_009783	NC_009784	Vibrio harveyi ATCC BAA-1116	Gammaproteobacteria	6.09	45.4	419.871	0.276276	0.464616		0.190729	0.152583	2.26586
51	NC_009925	0	Acaryochloris marina MBIC11017	Cyanobacteria	8.36	47	418.838	0.275596	0.636228		0.19026	0.152208	2.26029
52	NC_002976	0	Staphylococcus epidermidis RP62A	Firmicutes	2.64	32.1	417.832	0.274934	0.200432		0.189803	0.151842	2.25486
53	NC_007948	0	Polaromonas sp. JS666	Betaproteobacteria	5.9	62	416.852	0.274289	0.446884		0.189358	0.151486	2.24957
54	NC_007205	0	Candidatus Pelagibacter ubique HTCC1062	Alphaproteobacteria	1.3	29.7	415.896	0.27366	0.0982402		0.188924	0.151139	2.24441
55	NC_009767	0	Roseiflexus castenholzii DSM 13941	Chloroflexi	5.7	60.7	414.964	0.273047	0.42978		0.1885	0.1508	2.23938
56	NC_007333	0	Thermobifida fusca YX	Actinobacteria	3.6	67.5	414.055	0.272449	0.270845		0.188087	0.15047	2.23448
57	NC_003454	0	Fusobacterium nucleatum subsp. nucleatum ATCC 25586	Fusobacteria	2.17	27.2	413.167	0.271865	0.16291		0.187684	0.150147	2.22968
58	NC_004129	0	Pseudomonas fluorescens Pf-5	Gammaproteobacteria	7.1	63.3	412.3	0.271294	0.531904		0.18729	0.149832	2.22501
59	NC_009997	0	Shewanella baltica OS195	Gammaproteobacteria	5.5	46.2	411.453	0.270737	0.411192		0.186905	0.149524	2.22043
60	NC_008277	0	Borrelia afzelii PKo	Spirochaetes	1.24	27.8	410.625	0.270192	0.0925184		0.186529	0.149223	2.21597
61	NC_009348	0	Aeromonas salmonicida subsp. salmonicida A449	Gammaproteobacteria	5.03	58.2	409.816	0.269659	0.374557		0.186161	0.148929	2.2116
62	NC_010321	0	Thermoanaerobacter pseudethanolicus ATCC 33223	Firmicutes	2.4	34.5	409.023	0.269138	0.178369		0.185801	0.148641	2.20732
63	NC_004193	0	Oceanobacillus iheyensis HTE831	Firmicutes	3.63	35.7	408.248	0.268628	0.269272		0.185449	0.14836	2.20314
64	NC_009080	NC_009079	Burkholderia mallei NCTC 10247	Betaproteobacteria	5.9	68.5	407.489	0.268129	0.436847		0.185105	0.148084	2.19904
65	NC_008789	0	Halorhodospira halophila SL1	Gammaproteobacteria	2.7	68	406.746	0.26764	0.199548		0.184767	0.147814	2.19503
66	NC_008254	0	Mesorhizobium sp. BNC1	Alphaproteobacteria	4.94	61.1	406.018	0.267161	0.364446		0.184436	0.147549	2.1911
67	NC_008686	NC_008687	Paracoccus denitrificans PD1222	Alphaproteobacteria	5.25	66.8	405.305	0.266691	0.386636		0.184112	0.14729	2.18725
68	NC_002936	0	Dehalococcoides ethenogenes 195	Chloroflexi	1.47	48.9	404.606	0.266231	0.108071		0.183795	0.147036	2.18348
69	NC_009616	0	Thermosipho melanesiensis BI429	Thermotogae	1.9	31.4	403.92	0.26578	0.139447		0.183483	0.146787	2.17978
70	NC_002677	0	Mycobacterium leprae TN	Actinobacteria	3.27	57.8	403.247	0.265337	0.239596		0.183178	0.146542	2.17615
71	NC_009635	0	Methanococcus aeolicus Nankai-3	Euryarchaeota	1.6	30	402.587	0.264903	0.117042		0.182878	0.146302	2.17259
72	NC_007973	NC_007974	Ralstonia metallidurans CH34	Betaproteobacteria	6.91	63.5	401.94	0.264477	0.504661		0.182584	0.146067	2.16909
73	NC_007912	0	Saccharophagus degradans 2-40	Gammaproteobacteria	5.1	45.8	401.304	0.264059	0.371881		0.182295	0.145836	2.16566
74	NC_008618	0	Bifidobacterium adolescentis ATCC 15703	Actinobacteria	2.1	59.2	400.68	0.263648	0.152889		0.182011	0.145609	2.16229
75	NC_003919	0	Xanthomonas axonopodis pv. citri str. 306	Gammaproteobacteria	5.27	64.7	400.066	0.263244	0.383092		0.181733	0.145386	2.15898
76	NC_009727	0	Coxiella burnetii Dugway 5J108-111	Gammaproteobacteria	2.25	42.4	399.464	0.262848	0.163313		0.181459	0.145167	2.15573
77	NC_010582	0	Streptococcus pneumoniae CGSP14	Firmicutes	2.2	39.5	398.872	0.262458	0.159447		0.18119	0.144952	2.15254
78	NC_010184	0	Bacillus weihenstephanensis KBAB4	Firmicutes	5.91	35.5	398.29	0.262076	0.427709		0.180926	0.144741	2.1494
79	NC_008343	0	Granulibacter bethesdensis CGDNIH1	Alphaproteobacteria	2.7	59.1	397.718	0.261699	0.195119		0.180666	0.144533	2.14631
80	NC_007576	0	Lactobacillus sakei subsp. sakei 23K	Firmicutes	1.9	41.3	397.155	0.261329	0.137112		0.18041	0.144328	2.14328
81	NC_007716	0	Aster yellows witches'-broom phytoplasma AYWB	Firmicutes	0.73	26.8	396.602	0.260965	0.0526064		0.180159	0.144127	2.14029
82	NC_007481	NC_007482	Pseudoalteromonas haloplanktis TAC125	Gammaproteobacteria	3.85	40.1	396.058	0.260607	0.277064		0.179912	0.143929	2.13735
83	NC_009523	0	Roseiflexus sp. RS-1	Chloroflexi	5.8	60.4	395.522	0.260254	0.416831		0.179668	0.143735	2.13446
84	NC_002528	0	Buchnera aphidicola str. APS (Acyrthosiphon pisum)	Gammaproteobacteria	0.66	26.4	394.995	0.259907	0.0473693		0.179429	0.143543	2.13162
85	NC_008726	0	Mycobacterium vanbaalenii PYR-1	Actinobacteria	6.5	67.8	394.476	0.259566	0.465903		0.179193	0.143355	2.12882
86	NC_006814	0	Lactobacillus acidophilus NCFM	Firmicutes	2	34.7	393.965	0.25923	0.143169		0.178961	0.143169	2.12606
87	NC_008578	0	Acidothermus cellulolyticus 11B	Actinobacteria	2.4	66.9	393.462	0.258899	0.171583		0.178733	0.142986	2.12334
88	NC_008358	0	Hyphomonas neptunium ATCC 15444	Alphaproteobacteria	3.71	61.9	392.966	0.258573	0.264905		0.178508	0.142806	2.12067
89	NC_008527	0	Lactococcus lactis subsp. cremoris SK11	Firmicutes	2.56	35.8	392.478	0.258251	0.182565		0.178286	0.142629	2.11803
90	NC_007426	0	Natronomonas pharaonis DSM 2160	Euryarchaeota	2.75	63.1	391.997	0.257935	0.195874		0.178067	0.142454	2.11544
91	NC_007954	0	Shewanella denitrificans OS217	Gammaproteobacteria	4.55	45.1	391.523	0.257623	0.323691		0.177852	0.142282	2.11288
92	NC_009376	0	Pyrobaculum arsenaticum DSM 13514	Crenarchaeota	2.1	55.1	391.056	0.257316	0.149217		0.17764	0.142112	2.11036
93	NC_009719	0	Parvibaculum lavamentivorans DS-1	Alphaproteobacteria	3.9	62.3	390.596	0.257013	0.276792		0.177431	0.141944	2.10787
94	NC_007298	0	Dechloromonas aromatica RCB	Betaproteobacteria	4.5	59.2	390.141	0.256714	0.319004		0.177224	0.141779	2.10542
95	NC_007406	0	Nitrobacter winogradskyi Nb-255	Alphaproteobacteria	3.4	62	389.694	0.256419	0.240748		0.177021	0.141617	2.10301
96	NC_009634	0	Methanococcus vannielii SB	Euryarchaeota	1.7	31.3	389.252	0.256129	0.120238		0.17682	0.141456	2.10062
97	NC_006300	0	Mannheimia succiniciproducens MBEL55E	Gammaproteobacteria	2.31	42.5	388.816	0.255842	0.163199		0.176622	0.141298	2.09827
98	NC_007650	NC_007651	Burkholderia thailandensis E264	Betaproteobacteria	6.72	67.6	388.387	0.255559	0.474236		0.176427	0.141142	2.09595
99	NC_009338	0	Mycobacterium gilvum PYR-GCK	Actinobacteria	5.96	67.7	387.963	0.25528	0.420143		0.176234	0.140988	2.09367
100	NC_008571	0	Gramella forsetii KT0803	Bacteroidetes/Chlorobi	3.8	36.6	387.544	0.255005	0.267587		0.176044	0.140836	2.09141
101	NC_009483	0	Geobacter uraniireducens Rf4	Deltaproteobacteria	5.1	54.2	387.131	0.254733	0.358748		0.175857	0.140685	2.08918
102	NC_009706	0	Clostridium kluyveri DSM 555	Firmicutes	4.06	32	386.723	0.254465	0.285291		0.175672	0.140537	2.08698
103	NC_009776	0	Ignicoccus hospitalis KIN4/I	Crenarchaeota	1.3	56.5	386.321	0.2542	0.0912542		0.175489	0.140391	2.08481
104	NC_002939	0	Geobacter sulfurreducens PCA	Deltaproteobacteria	3.81	60.9	385.924	0.253938	0.26717		0.175308	0.140247	2.08266
105	NC_005956	0	Bartonella henselae str. Houston-1	Alphaproteobacteria	1.93	38.2	385.531	0.25368	0.1352		0.17513	0.140104	2.08054
106	NC_004369	0	Corynebacterium efficiens YS-314	Actinobacteria	3.15	63.1	385.144	0.253425	0.220442		0.174954	0.139963	2.07845
107	NC_010175	0	Chloroflexus aurantiacus J-10-fl	Chloroflexi	5.3	56.7	384.761	0.253173	0.370534		0.17478	0.139824	2.07639
108	NC_007168	0	Staphylococcus haemolyticus JCSC1435	Firmicutes	2.7	32.8	384.383	0.252925	0.188577		0.174608	0.139687	2.07435
109	NC_010125	0	Gluconacetobacter diazotrophicus PAl 5	Alphaproteobacteria	4.3	66.3	384.009	0.252679	0.300034		0.174439	0.139551	2.07233
110	NC_009484	0	Acidiphilium cryptum JF-5	Alphaproteobacteria	3.97	67.1	383.64	0.252436	0.276742		0.174271	0.139417	2.07034
111	NC_008529	0	Lactobacillus delbrueckii subsp. bulgaricus ATCC BAA-365	Firmicutes	1.9	49.7	383.275	0.252196	0.13232		0.174105	0.139284	2.06837
112	NC_009848	0	Bacillus pumilus SAFR-032	Firmicutes	3.7	41.3	382.915	0.251959	0.257433		0.173941	0.139153	2.06642
113	NC_000963	0	Rickettsia prowazekii str. Madrid E	Alphaproteobacteria	1.11	29	382.558	0.251724	0.0771581		0.17378	0.139024	2.0645
114	NC_009828	0	Thermotoga lettingae TMO	Thermotogae	2.1	38.7	382.206	0.251492	0.14584		0.17362	0.138896	2.0626
115	NC_008095	0	Myxococcus xanthus DK 1622	Deltaproteobacteria	9.1	68.9	381.858	0.251263	0.6314		0.173461	0.138769	2.06072
116	NC_009328	0	Geobacillus thermodenitrificans NG80-2	Firmicutes	3.6	48.9	381.514	0.251037	0.249559		0.173305	0.138644	2.05886
117	NC_010628	0	Nostoc punctiforme PCC 73102	Cyanobacteria	9.01	41.4	381.173	0.250813	0.624034		0.17315	0.13852	2.05703
118	NC_009614	0	Bacteroides vulgatus ATCC 8482	Bacteroidetes/Chlorobi	5.2	42.2	380.837	0.250591	0.359835		0.172997	0.138398	2.05521
119	NC_009515	0	Methanobrevibacter smithii ATCC 35061	Euryarchaeota	1.9	31	380.504	0.250372	0.131363		0.172846	0.138277	2.05341
120	NC_010531	0	Polynucleobacter necessarius STIR1	Betaproteobacteria	1.6	45.6	380.174	0.250155	0.110526		0.172697	0.138157	2.05163
121	NC_008782	0	Acidovorax sp. JS42	Betaproteobacteria	4.54	66.1	379.848	0.249941	0.313348		0.172549	0.138039	2.04988
122	NC_008532	0	Streptococcus thermophilus LMD-9	Firmicutes	1.91	39.1	379.526	0.249729	0.131715		0.172402	0.137922	2.04814
123	NC_009442	0	Streptococcus suis 05ZYH33	Firmicutes	2.1	41.1	379.207	0.249519	0.144696		0.172257	0.137806	2.04642
124	NC_008570	0	Aeromonas hydrophila subsp. hydrophila ATCC 7966	Gammaproteobacteria	4.7	61.5	378.892	0.249311	0.323574		0.172114	0.137691	2.04471
125	NC_010506	0	Shewanella woodyi ATCC 51908	Gammaproteobacteria	5.9	43.7	378.579	0.249106	0.405854		0.171972	0.137578	2.04303
126	NC_007964	0	Nitrobacter hamburgensis X14	Alphaproteobacteria	5.01	61.6	378.27	0.248903	0.344351		0.171832	0.137465	2.04136
127	NC_010519	0	Haemophilus somnus 2336	Gammaproteobacteria	2.3	37.4	377.964	0.248701	0.157957		0.171693	0.137354	2.03971
128	NC_010508	NC_010515,NC_010512	Burkholderia cenocepacia MC0-3	Betaproteobacteria	7.9	66.6	377.662	0.248502	0.542115		0.171555	0.137244	2.03808
129	NC_008044	0	Silicibacter sp. TM1040	Alphaproteobacteria	4.15	60.1	377.362	0.248305	0.284556		0.171419	0.137135	2.03646
130	NC_006513	0	Azoarcus sp. EbN1	Betaproteobacteria	4.73	64.7	377.065	0.24811	0.32407		0.171284	0.137027	2.03486
131	NC_009092	0	Shewanella loihica PV-4	Gammaproteobacteria	4.6	53.7	376.772	0.247916	0.314918		0.171151	0.136921	2.03327
132	NC_007204	0	Psychrobacter arcticus 273-4	Gammaproteobacteria	2.65	42.8	376.481	0.247725	0.18128		0.171019	0.136815	2.0317
133	NC_000868	0	Pyrococcus abyssi GE5	Euryarchaeota	1.77	44.7	376.193	0.247535	0.120989		0.170888	0.13671	2.03015
134	NC_009663	0	Sulfurovum sp. NBC37-1	Epsilonproteobacteria	2.6	43.9	375.908	0.247348	0.177589		0.170758	0.136607	2.02861
135	NC_003112	0	Neisseria meningitidis MC58	Betaproteobacteria	2.3	51.5	375.625	0.247162	0.15698		0.17063	0.136504	2.02709
136	NC_010161	0	Bartonella tribocorum CIP 105476	Alphaproteobacteria	2.62	38.8	375.345	0.246978	0.178687		0.170503	0.136402	2.02558
137	NC_008555	0	Listeria welshimeri serovar 6b str. SLCC5334	Firmicutes	2.8	36.4	375.068	0.246796	0.190822		0.170377	0.136302	2.02408
138	NC_009901	0	Shewanella pealeana ATCC 700345	Gammaproteobacteria	5.2	44.7	374.794	0.246615	0.354125		0.170252	0.136202	2.0226
139	NC_009513	0	Lactobacillus reuteri F275	Firmicutes	2	38.9	374.522	0.246436	0.136103		0.170129	0.136103	2.02113
140	NC_009089	0	Clostridium difficile 630	Firmicutes	4.31	29.1	374.252	0.246259	0.293091		0.170007	0.136005	2.01968
141	NC_009567	0	Haemophilus influenzae PittGG	Gammaproteobacteria	1.9	38	373.985	0.246083	0.129113		0.169885	0.135908	2.01824
142	NC_006156	0	Borrelia garinii PBi	Spirochaetes	0.98	28.1	373.721	0.245909	0.0665479		0.169765	0.135812	2.01681
143	NC_006510	0	Geobacillus kaustophilus HTA426	Firmicutes	3.59	52	373.459	0.245737	0.243612		0.169646	0.135717	2.01539
144	NC_010364	0	Halobacterium salinarum R1	Euryarchaeota	2.66	65.7	373.199	0.245566	0.180378		0.169528	0.135622	2.01399
145	NC_010471	0	Leuconostoc citreum KM20	Firmicutes	1.9	38.9	372.942	0.245396	0.128752		0.169411	0.135529	2.0126
146	NC_008346	0	Syntrophomonas wolfei subsp. wolfei str. Goettingen	Other Bacteria	2.94	44.9	372.686	0.245228	0.199091		0.169295	0.135436	2.01123
147	NC_010296	0	Microcystis aeruginosa NIES-843	Cyanobacteria	5.8	42.3	372.434	0.245062	0.392498		0.16918	0.135344	2.00986
148	NC_004113	0	Thermosynechococcus elongatus BP-1	Cyanobacteria	2.59	53.9	372.183	0.244897	0.175153		0.169066	0.135253	2.00851
149	NC_005835	0	Thermus thermophilus HB27	Deinococcus-Thermus	2.13	69.4	371.934	0.244733	0.143948		0.168954	0.135163	2.00717
150	NC_010320	0	Thermoanaerobacter sp. X514	Firmicutes	2.5	34.5	371.688	0.244571	0.168842		0.168842	0.135073	2.00584
151	NC_004342	NC_004343	Leptospira interrogans serovar Lai str. 56601	Spirochaetes	4.69	35	371.444	0.244411	0.316539		0.168731	0.134985	2.00452
152	NC_010729	0	Porphyromonas gingivalis ATCC 33277	Bacteroidetes/Chlorobi	2.4	48.4	371.202	0.244251	0.161876		0.168621	0.134897	2.00321
153	NC_008345	0	Shewanella frigidimarina NCIMB 400	Gammaproteobacteria	4.85	41.6	370.961	0.244093	0.326913		0.168512	0.134809	2.00192
154	NC_004757	0	Nitrosomonas europaea ATCC 19718	Betaproteobacteria	2.81	50.7	370.723	0.243937	0.189285		0.168403	0.134723	2.00063
155	NC_006087	0	Leifsonia xyli subsp. xyli str. CTCB07	Actinobacteria	2.58	67.7	370.487	0.243781	0.173682		0.168296	0.134637	1.99936
156	NC_009497	0	Mycoplasma agalactiae PG2	Firmicutes	0.88	29.7	370.253	0.243627	0.0592028		0.16819	0.134552	1.99809
157	NC_005877	0	Picrophilus torridus DSM 9790	Euryarchaeota	1.55	36	370.021	0.243474	0.104212		0.168084	0.134467	1.99684
158	NC_002932	0	Chlorobium tepidum TLS	Bacteroidetes/Chlorobi	2.15	56.5	369.79	0.243323	0.144463		0.16798	0.134384	1.9956
159	NC_008312	0	Trichodesmium erythraeum IMS101	Cyanobacteria	7.8	34.1	369.562	0.243172	0.523773		0.167876	0.134301	1.99437
160	NC_008011	0	Lawsonia intracellularis PHE/MN1-00	Deltaproteobacteria	1.76	33.1	369.335	0.243023	0.118112		0.167773	0.134218	1.99314
161	NC_007760	0	Anaeromyxobacter dehalogenans 2CP-C	Deltaproteobacteria	5	74.9	369.111	0.242875	0.335342		0.167671	0.134137	1.99193
162	NC_010545	0	Corynebacterium urealyticum DSM 7109	Actinobacteria	2.37	64.2	368.887	0.242729	0.158856		0.167569	0.134056	1.99073
163	NC_009656	0	Pseudomonas aeruginosa PA7	Gammaproteobacteria	6.6	66.4	368.666	0.242583	0.442118		0.167469	0.133975	1.98953
164	NC_002607	0	Halobacterium sp. NRC-1	Euryarchaeota	2.57	65.9	368.447	0.242439	0.172056		0.167369	0.133895	1.98835
165	NC_005213	0	Nanoarchaeum equitans Kin4-M	Nanoarchaeota	0.49	31.6	368.229	0.242295	0.032785		0.16727	0.133816	1.98717
166	NC_007940	0	Rickettsia bellii RML369-C	Alphaproteobacteria	1.52	31.6	368.013	0.242153	0.101641		0.167172	0.133738	1.986
167	NC_010814	0	Geobacter lovleyi SZ	Deltaproteobacteria	3.98	54.7	367.798	0.242012	0.265983		0.167075	0.13366	1.98485
168	NC_006370	NC_006371	Photobacterium profundum SS9	Gammaproteobacteria	6.38	41.7	367.585	0.241872	0.426128		0.166978	0.133582	1.9837
169	NC_007575	0	Sulfurimonas denitrificans DSM 1251	Epsilonproteobacteria	2.2	34.5	367.374	0.241733	0.146856		0.166882	0.133506	1.98256
170	NC_008942	0	Methanocorpusculum labreanum Z	Euryarchaeota	1.8	50	367.165	0.241595	0.120087		0.166787	0.13343	1.98143
171	NC_003869	0	Thermoanaerobacter tengcongensis MB4	Firmicutes	2.69	37.6	366.957	0.241458	0.179361		0.166692	0.133354	1.98031
172	NC_010694	0	Erwinia tasmaniensis	Gammaproteobacteria	4.08	53.4	366.75	0.241322	0.271889		0.166599	0.133279	1.97919
173	NC_008553	0	Methanosaeta thermophila PT	Euryarchaeota	1.9	53.5	366.545	0.241187	0.126544		0.166506	0.133204	1.97809
174	NC_009486	0	Thermotoga petrophila RKU-1	Thermotogae	1.8	46.1	366.342	0.241054	0.119817		0.166413	0.13313	1.97699
175	NC_002179	0	Chlamydophila pneumoniae AR39	Chlamydiae/Verrucomicrobia	1.23	40.6	366.14	0.240921	0.0818301		0.166321	0.133057	1.9759
176	NC_008340	0	Alkalilimnicola ehrlichei MLHE-1	Gammaproteobacteria	3.3	67.5	365.94	0.240789	0.219424		0.16623	0.132984	1.97482
177	NC_008209	0	Roseobacter denitrificans OCh 114	Alphaproteobacteria	4.3	58.9	365.741	0.240658	0.285761		0.16614	0.132912	1.97374
178	NC_010424	0	Candidatus Desulforudis audaxviator MP104C	Firmicutes	2.3	60.8	365.543	0.240528	0.152766		0.16605	0.13284	1.97268
179	NC_006677	0	Gluconobacter oxydans 621H	Alphaproteobacteria	2.92	60.8	365.347	0.240399	0.193843		0.165961	0.132769	1.97162
180	NC_009715	0	Campylobacter curvus 525.92	Epsilonproteobacteria	2	44.5	365.152	0.240271	0.132698		0.165873	0.132698	1.97057
181	NC_009617	0	Clostridium beijerinckii NCIMB 8052	Firmicutes	6	29.9	364.959	0.240143	0.397884		0.165785	0.132628	1.96952
182	NC_008593	0	Clostridium novyi NT	Firmicutes	2.5	28.9	364.767	0.240017	0.165698		0.165698	0.132558	1.96849
183	NC_008497	0	Lactobacillus brevis ATCC 367	Firmicutes	2.35	46.1	364.576	0.239892	0.155674		0.165611	0.132489	1.96746
184	NC_009009	0	Streptococcus sanguinis SK36	Firmicutes	2.4	43.4	364.387	0.239767	0.158904		0.165525	0.13242	1.96644
185	NC_008278	0	Frankia alni ACN14a	Actinobacteria	7.5	72.8	364.199	0.239643	0.496319		0.16544	0.132352	1.96542
186	NC_009012	0	Clostridium thermocellum ATCC 27405	Firmicutes	3.8	39	364.012	0.239521	0.251339		0.165355	0.132284	1.96442
187	NC_009253	0	Desulfotomaculum reducens MI-1	Firmicutes	3.6	42.3	363.827	0.239399	0.23799		0.165271	0.132216	1.96341
188	NC_010571	0	Opitutus terrae PB90-1	Other Bacteria	6	65.3	363.643	0.239277	0.396449		0.165187	0.13215	1.96242
189	NC_009051	0	Methanoculleus marisnigri JR1	Euryarchaeota	2.5	62.1	363.46	0.239157	0.165104		0.165104	0.132083	1.96143
190	NC_009613	0	Flavobacterium psychrophilum JIP02/86	Bacteroidetes/Chlorobi	2.9	32.5	363.278	0.239038	0.191425		0.165021	0.132017	1.96045
191	NC_009505	NC_009504	Brucella ovis ATCC 25840	Alphaproteobacteria	3.3	57.2	363.098	0.238919	0.21772		0.164939	0.131951	1.95948
192	NC_003413	0	Pyrococcus furiosus DSM 3638	Euryarchaeota	1.9	40.8	362.918	0.238801	0.125292		0.164858	0.131886	1.95851
193	NC_008610	0	Candidatus Ruthia magnifica str. Cm (Calyptogena magnifica)	Gammaproteobacteria	1.2	34	362.74	0.238684	0.079093		0.164777	0.131822	1.95755
194	NC_002696	0	Caulobacter crescentus CB15	Alphaproteobacteria	4	67.2	362.563	0.238567	0.263515		0.164697	0.131757	1.9566
195	NC_006512	0	Idiomarina loihiensis L2TR	Gammaproteobacteria	2.84	47	362.388	0.238452	0.187005		0.164617	0.131693	1.95565
196	NC_006085	0	Propionibacterium acnes KPA171202	Actinobacteria	2.56	60	362.213	0.238337	0.168486		0.164538	0.13163	1.95471
197	NC_008781	0	Polaromonas naphthalenivorans CJ2	Betaproteobacteria	5.35	61.7	362.04	0.238223	0.351942		0.164459	0.131567	1.95377
198	NC_008709	0	Psychromonas ingrahamii 37	Gammaproteobacteria	4.6	40.1	361.867	0.238109	0.30246		0.16438	0.131504	1.95284
199	NC_004463	0	Bradyrhizobium japonicum USDA 110	Alphaproteobacteria	9.1	64.1	361.696	0.237997	0.598062		0.164303	0.131442	1.95192
200	NC_000916	0	Methanothermobacter thermautotrophicus str. Delta H	Euryarchaeota	1.8	49.5	361.526	0.237885	0.118242		0.164225	0.13138	1.951
201	NC_009380	0	Salinispora tropica CNB-440	Actinobacteria	5.2	69.5	361.357	0.237773	0.341429		0.164149	0.131319	1.95009
202	NC_009085	0	Acinetobacter baumannii ATCC 17978	Gammaproteobacteria	4.02	38.9	361.189	0.237663	0.263828		0.164072	0.131258	1.94918
203	NC_003295	0	Ralstonia solanacearum GMI1000	Betaproteobacteria	5.8	67	361.022	0.237553	0.380472		0.163997	0.131197	1.94828
204	NC_010163	0	Acholeplasma laidlawii PG-8A	Firmicutes	1.5	31.9	360.856	0.237444	0.0983527		0.163921	0.131137	1.94738
205	NC_008260	0	Alcanivorax borkumensis SK2	Gammaproteobacteria	3.1	54.7	360.691	0.237335	0.203169		0.163846	0.131077	1.94649
206	NC_007681	0	Methanosphaera stadtmanae DSM 3091	Euryarchaeota	1.77	27.6	360.527	0.237228	0.115951		0.163772	0.131018	1.94561
207	NC_004557	0	Clostridium tetani E88	Firmicutes	2.87	28.6	360.365	0.237121	0.187925		0.163698	0.130958	1.94473
208	NC_010170	0	Bordetella petrii DSM 12804	Betaproteobacteria	5.3	65.5	360.203	0.237014	0.346884		0.163624	0.1309	1.94386
209	NC_002578	0	Thermoplasma acidophilum DSM 1728	Euryarchaeota	1.6	46	360.042	0.236908	0.104673		0.163551	0.130841	1.94299
210	NC_002978	0	Wolbachia endosymbiont of Drosophila melanogaster	Alphaproteobacteria	1.27	35.2	359.882	0.236803	0.0830472		0.163479	0.130783	1.94213
211	NC_007963	0	Chromohalobacter salexigens DSM 3043	Gammaproteobacteria	3.7	63.9	359.723	0.236699	0.241842		0.163407	0.130725	1.94127
212	NC_009655	0	Actinobacillus succinogenes 130Z	Gammaproteobacteria	2.3	44.9	359.565	0.236595	0.150268		0.163335	0.130668	1.94042
213	NC_002946	0	Neisseria gonorrhoeae FA 1090	Betaproteobacteria	2.15	52.7	359.409	0.236491	0.140407		0.163264	0.130611	1.93957
214	NC_006055	0	Mesoplasma florum L1	Firmicutes	0.79	27	359.252	0.236389	0.0515689		0.163193	0.130554	1.93873
215	NC_000117	0	Chlamydia trachomatis D/UW-3/CX	Chlamydiae/Verrucomicrobia	1.04	41.3	359.097	0.236287	0.0678589		0.163122	0.130498	1.93789
216	NC_002771	0	Mycoplasma pulmonis UAB CTIP	Firmicutes	0.96	26.6	358.943	0.236185	0.0626121		0.163052	0.130442	1.93706
217	NC_010645	0	Bordetella avium 197N	Betaproteobacteria	3.7	61.6	358.79	0.236084	0.241214		0.162983	0.130386	1.93623
218	NC_009952	0	Dinoroseobacter shibae DFL 12	Alphaproteobacteria	4.43	65.5	358.638	0.235984	0.288683		0.162913	0.130331	1.93541
219	NC_009831	0	Shewanella sediminis HAW-EB3	Gammaproteobacteria	5.5	46.1	358.486	0.235884	0.358258		0.162845	0.130276	1.93459
220	NC_010602	NC_010843	Leptospira biflexa serovar Patoc strain 'Patoc 1 (Paris)'	Spirochaetes	3.95	38.9	358.335	0.235785	0.257186		0.162776	0.130221	1.93378
221	NC_010524	0	Leptothrix cholodnii SP-6	Betaproteobacteria	4.9	68.9	358.186	0.235687	0.318908		0.162708	0.130166	1.93297
222	NC_009667	NC_009668	Ochrobactrum anthropi ATCC 49188	Alphaproteobacteria	5.22	56.1	358.037	0.235589	0.339593		0.16264	0.130112	1.93217
223	NC_007512	0	Pelodictyon luteolum DSM 273	Bacteroidetes/Chlorobi	2.36	57.3	357.889	0.235491	0.153469		0.162573	0.130059	1.93137
224	NC_003361	0	Chlamydophila caviae GPIC	Chlamydiae/Verrucomicrobia	1.18	39.2	357.742	0.235395	0.076703		0.162506	0.130005	1.93058
225	NC_009256	NC_009255,NC_009254	Burkholderia vietnamiensis G4	Betaproteobacteria	8.4	65.7	357.595	0.235298	0.545798		0.16244	0.129952	1.92979
226	NC_002935	0	Corynebacterium diphtheriae NCTC 13129	Actinobacteria	2.49	53.5	357.45	0.235202	0.161724		0.162374	0.129899	1.929
227	NC_006138	0	Desulfotalea psychrophila LSv54	Deltaproteobacteria	3.64	46.6	357.305	0.235107	0.23632		0.162308	0.129846	1.92822
228	NC_010085	0	Nitrosopumilus maritimus SCM1	Crenarchaeota	1.6	34.2	357.161	0.235013	0.103835		0.162243	0.129794	1.92744
229	NC_008268	0	Rhodococcus sp. RHA1	Actinobacteria	9.67	67	357.018	0.234918	0.627303		0.162178	0.129742	1.92667
230	NC_009648	0	Klebsiella pneumoniae subsp. pneumoniae MGH 78578	Gammaproteobacteria	5.69	57.1	356.876	0.234825	0.368969		0.162113	0.12969	1.9259
231	NC_007802	0	Jannaschia sp. CCS1	Alphaproteobacteria	4.39	62.2	356.734	0.234732	0.284557		0.162049	0.129639	1.92514
232	NC_009850	0	Arcobacter butzleri RM4018	Epsilonproteobacteria	2.3	27	356.593	0.234639	0.149026		0.161985	0.129588	1.92438
233	NC_008541	0	Arthrobacter sp. FB24	Actinobacteria	5.08	65.4	356.453	0.234547	0.329024		0.161921	0.129537	1.92362
234	NC_010556	0	Exiguobacterium sibiricum 255-15	Firmicutes	3.01	47.7	356.314	0.234455	0.194877		0.161858	0.129486	1.92287
235	NC_009446	0	Dichelobacter nodosus VCS1703A	Gammaproteobacteria	1.4	44.4	356.176	0.234364	0.0906052		0.161795	0.129436	1.92212
236	NC_001263	NC_001264	Deinococcus radiodurans R1	Deinococcus-Thermus	3.24	66.6	356.038	0.234273	0.209605		0.161732	0.129386	1.92138
237	NC_008769	0	Mycobacterium bovis BCG str. Pasteur 1173P2	Actinobacteria	4.4	65.6	355.901	0.234183	0.28454		0.16167	0.129336	1.92064
238	NC_005966	0	Acinetobacter sp. ADP1	Gammaproteobacteria	3.6	40.4	355.765	0.234094	0.232716		0.161608	0.129287	1.91991
239	NC_006396	NC_006397	Haloarcula marismortui ATCC 43049	Euryarchaeota	4.28	61.1	355.629	0.234004	0.276568		0.161547	0.129237	1.91918
240	NC_009879	0	Rickettsia canadensis str. McKiel	Alphaproteobacteria	1.2	31.1	355.494	0.233916	0.077513		0.161485	0.129188	1.91845
241	NC_010172	0	Methylobacterium extorquens PA1	Alphaproteobacteria	5.5	68.2	355.36	0.233828	0.355134		0.161425	0.12914	1.91772
242	NC_007356	0	Dehalococcoides sp. CBDB1	Chloroflexi	1.4	47	355.227	0.23374	0.0903638		0.161364	0.129091	1.917
243	NC_001318	0	Borrelia burgdorferi B31	Spirochaetes	1.52	28.2	355.094	0.233652	0.0980726		0.161304	0.129043	1.91629
244	NC_007530	0	Bacillus anthracis str. 'Ames Ancestor'	Firmicutes	5.5	35.2	354.962	0.233566	0.354736		0.161244	0.128995	1.91558
245	NC_003912	0	Campylobacter jejuni RM1221	Epsilonproteobacteria	1.8	30.3	354.831	0.233479	0.116052		0.161184	0.128947	1.91487
246	NC_000917	0	Archaeoglobus fulgidus DSM 4304	Euryarchaeota	2.18	48.6	354.7	0.233393	0.140501		0.161125	0.1289	1.91416
247	NC_009436	0	Enterobacter sp. 638	Gammaproteobacteria	4.66	52.9	354.57	0.233308	0.300226		0.161066	0.128852	1.91346
248	NC_009785	0	Streptococcus gordonii str. Challis substr. CH1	Firmicutes	2.2	40.5	354.441	0.233222	0.141686		0.161007	0.128805	1.91276
249	NC_007797	0	Anaplasma phagocytophilum HZ	Alphaproteobacteria	1.47	41.6	354.312	0.233138	0.0946377		0.160948	0.128759	1.91207
250	NC_002977	0	Methylococcus capsulatus str. Bath	Gammaproteobacteria	3.3	63.6	354.184	0.233054	0.212375		0.16089	0.128712	1.91138
251	NC_008818	0	Hyperthermus butylicus DSM 5456	Crenarchaeota	1.7	53.7	354.057	0.23297	0.109366		0.160832	0.128666	1.91069
252	NC_007519	0	Desulfovibrio desulfuricans subsp. desulfuricans str. G20	Deltaproteobacteria	3.73	57.8	353.93	0.232886	0.239876		0.160775	0.12862	1.91001
253	NC_002689	0	Thermoplasma volcanium GSS1	Euryarchaeota	1.58	39.9	353.804	0.232803	0.101574		0.160718	0.128574	1.90932
254	NC_010482	0	Candidatus Korarchaeum cryptofilum OPF8	Other Archaea	1.6	49	353.678	0.232721	0.102823		0.160661	0.128528	1.90865
255	NC_008600	0	Bacillus thuringiensis str. Al Hakam	Firmicutes	5.36	35.4	353.553	0.232639	0.344335		0.160604	0.128483	1.90797
256	NC_005139	NC_005140	Vibrio vulnificus YJ016	Gammaproteobacteria	5.26	46.7	353.429	0.232557	0.337792		0.160547	0.128438	1.9073
257	NC_008786	0	Verminephrobacter eiseniae EF01-2	Betaproteobacteria	5.63	65.2	353.306	0.232476	0.361426		0.160491	0.128393	1.90664
258	NC_010334	0	Shewanella halifaxensis HAW-EB4	Gammaproteobacteria	5.2	44.6	353.183	0.232395	0.333706		0.160435	0.128348	1.90597
259	NC_004350	0	Streptococcus mutans UA159	Firmicutes	2.03	36.8	353.06	0.232314	0.130228		0.16038	0.128304	1.90531
260	NC_002937	0	Desulfovibrio vulgaris subsp. vulgaris str. Hildenborough	Deltaproteobacteria	3.8	63.3	352.938	0.232234	0.243693		0.160324	0.12826	1.90465
261	NC_007796	0	Methanospirillum hungatei JF-1	Euryarchaeota	3.54	45.1	352.817	0.232154	0.226942		0.160269	0.128216	1.904
262	NC_009488	0	Orientia tsutsugamushi str. Boryong	Alphaproteobacteria	2.1	30.5	352.697	0.232075	0.13458		0.160215	0.128172	1.90335
263	NC_006347	0	Bacteroides fragilis YCH46	Bacteroidetes/Chlorobi	5.31	43.2	352.576	0.231996	0.34018		0.16016	0.128128	1.9027
264	NC_008701	0	Pyrobaculum islandicum DSM 4184	Crenarchaeota	1.8	49.6	352.457	0.231917	0.115276		0.160106	0.128085	1.90206
265	NC_007969	0	Psychrobacter cryohalolentis K5	Gammaproteobacteria	3.1	42.2	352.338	0.231839	0.198464		0.160052	0.128041	1.90142
266	NC_010511	0	Methylobacterium sp. 4-46	Alphaproteobacteria	7.78	71.5	352.22	0.231761	0.497914		0.159998	0.127998	1.90078
267	NC_009832	0	Serratia proteamaculans 568	Gammaproteobacteria	5.45	55	352.102	0.231684	0.348679		0.159945	0.127956	1.90014
268	NC_009142	0	Saccharopolyspora erythraea NRRL 2338	Actinobacteria	8.2	71.1	351.985	0.231607	0.524444		0.159891	0.127913	1.89951
269	NC_004368	0	Streptococcus agalactiae NEM316	Firmicutes	2.2	35.6	351.868	0.23153	0.140658		0.159838	0.127871	1.89888
270	NC_010168	0	Renibacterium salmoninarum ATCC 33209	Actinobacteria	3.2	56.3	351.752	0.231453	0.204526		0.159786	0.127828	1.89825
271	NC_006526	0	Zymomonas mobilis subsp. mobilis ZM4	Alphaproteobacteria	2.06	46.3	351.636	0.231377	0.13162		0.159733	0.127786	1.89763
272	NC_007626	0	Magnetospirillum magneticum AMB-1	Alphaproteobacteria	5	65.1	351.521	0.231302	0.319362		0.159681	0.127745	1.89701
273	NC_009900	0	Rickettsia massiliae MTU5	Alphaproteobacteria	1.41	32.5	351.407	0.231226	0.0900306		0.159629	0.127703	1.89639
274	NC_008380	0	Rhizobium leguminosarum bv. viciae 3841	Alphaproteobacteria	7.79	55	351.293	0.231151	0.497242		0.159577	0.127662	1.89578
275	NC_009708	0	Yersinia pseudotuberculosis IP 31758	Gammaproteobacteria	4.91	47.2	351.179	0.231077	0.313308		0.159525	0.12762	1.89516
276	NC_003212	0	Listeria innocua Clip11262	Firmicutes	3.09	37.4	351.067	0.231002	0.19711		0.159474	0.127579	1.89455
277	NC_007498	0	Pelobacter carbinolicus DSM 2380	Deltaproteobacteria	3.7	55.1	350.954	0.230928	0.235946		0.159423	0.127538	1.89395
278	NC_003030	0	Clostridium acetobutylicum ATCC 824	Firmicutes	4.13	30.9	350.842	0.230855	0.263283		0.159372	0.127498	1.89334
279	NC_007355	0	Methanosarcina barkeri str. Fusaro	Euryarchaeota	4.84	39.2	350.731	0.230781	0.308447		0.159322	0.127457	1.89274
280	NC_008512	0	Candidatus Carsonella ruddii PV	Gammaproteobacteria	0.16	16.6	350.62	0.230708	0.0101934		0.159271	0.127417	1.89214
281	NC_002570	0	Bacillus halodurans C-125	Firmicutes	4.2	43.7	350.509	0.230636	0.267492		0.159221	0.127377	1.89155
282	NC_003888	0	Streptomyces coelicolor A3(2)	Actinobacteria	9.09	72	350.4	0.230564	0.578747		0.159171	0.127337	1.89095
283	NC_002488	0	Xylella fastidiosa 9a5c	Gammaproteobacteria	2.73	52.6	350.29	0.230492	0.173761		0.159122	0.127297	1.89036
284	NC_009792	0	Citrobacter koseri ATCC BAA-895	Gammaproteobacteria	4.71	53.8	350.181	0.23042	0.299692		0.159072	0.127258	1.88978
285	NC_007350	0	Staphylococcus saprophyticus subsp. saprophyticus ATCC 15305	Firmicutes	2.56	33.2	350.073	0.230348	0.162839		0.159023	0.127218	1.88919
286	NC_010376	0	Finegoldia magna ATCC 29328	Firmicutes	1.99	32.1	349.965	0.230277	0.126543		0.158974	0.127179	1.88861
287	NC_008435	0	Rhodopseudomonas palustris BisA53	Alphaproteobacteria	5.51	64.4	349.857	0.230207	0.35027		0.158925	0.12714	1.88803
288	NC_009511	0	Sphingomonas wittichii RW1	Alphaproteobacteria	5.93	67.9	349.75	0.230136	0.376855		0.158876	0.127101	1.88745
289	NC_005955	0	Bartonella quintana str. Toulouse	Alphaproteobacteria	1.58	38.8	349.644	0.230066	0.100379		0.158828	0.127062	1.88688
290	NC_009954	0	Caldivirga maquilingensis IC-167	Crenarchaeota	2.1	43.1	349.538	0.229996	0.133375		0.15878	0.127024	1.8863
291	NC_007614	0	Nitrosospira multiformis ATCC 25196	Betaproteobacteria	3.23	53.9	349.432	0.229927	0.205081		0.158732	0.126985	1.88573
292	NC_002754	0	Sulfolobus solfataricus P2	Crenarchaeota	3	35.8	349.327	0.229858	0.190421		0.158684	0.126947	1.88517
293	NC_007761	0	Rhizobium etli CFN 42	Alphaproteobacteria	6.53	61	349.222	0.229789	0.414358		0.158636	0.126909	1.8846
294	NC_008611	0	Mycobacterium ulcerans Agy99	Actinobacteria	5.6	65.5	349.118	0.22972	0.355239		0.158589	0.126871	1.88404
295	NC_009379	0	Polynucleobacter sp. QLW-P1DMWA-1	Betaproteobacteria	2.2	44.8	349.014	0.229652	0.139517		0.158542	0.126833	1.88348
296	NC_002940	0	Haemophilus ducreyi 35000HP	Gammaproteobacteria	1.7	38.2	348.911	0.229584	0.107777		0.158495	0.126796	1.88292
297	NC_008344	0	Nitrosomonas eutropha C91	Betaproteobacteria	2.82	48.5	348.808	0.229516	0.178729		0.158448	0.126758	1.88236
298	NC_009456	NC_009457	Vibrio cholerae O395	Gammaproteobacteria	4.1	47.5	348.705	0.229449	0.259779		0.158402	0.126721	1.88181
299	NC_007404	0	Thiobacillus denitrificans ATCC 25259	Betaproteobacteria	2.91	66.1	348.603	0.229381	0.184325		0.158355	0.126684	1.88126
300	NC_003364	0	Pyrobaculum aerophilum str. IM2	Crenarchaeota	2.2	51.4	348.501	0.229315	0.139312		0.158309	0.126647	1.88071
301	NC_007643	0	Rhodospirillum rubrum ATCC 11170	Alphaproteobacteria	4.41	65.4	348.4	0.229248	0.279176		0.158263	0.12661	1.88016
302	NC_010730	0	Sulfurihydrogenibium sp. YO3AOP1	Aquificae	1.8	32	348.299	0.229182	0.113916		0.158217	0.126574	1.87962
303	NC_010658	0	Shigella boydii CDC 3083-94	Gammaproteobacteria	4.86	51	348.199	0.229116	0.307486		0.158172	0.126537	1.87908
304	NC_007493	NC_007494	Rhodobacter sphaeroides 2.4.1	Alphaproteobacteria	4.61	68.8	348.099	0.22905	0.291585		0.158126	0.126501	1.87854
305	NC_005126	0	Photorhabdus luminescens subsp. laumondii TTO1	Gammaproteobacteria	5.69	42.8	348	0.228984	0.359792		0.158081	0.126465	1.878
306	NC_000908	0	Mycoplasma genitalium G37	Firmicutes	0.58	31.7	347.9	0.228919	0.0366643		0.158036	0.126429	1.87747
307	NC_010001	0	Clostridium phytofermentans ISDg	Firmicutes	4.8	35.3	347.802	0.228854	0.303343		0.157991	0.126393	1.87693
308	NC_009465	0	Candidatus Vesicomyosocius okutanii HA	Gammaproteobacteria	1	31.6	347.703	0.228789	0.0631786		0.157946	0.126357	1.8764
309	NC_007484	0	Nitrosococcus oceani ATCC 19707	Gammaproteobacteria	3.54	50.3	347.605	0.228725	0.223589		0.157902	0.126322	1.87588
310	NC_009636	0	Sinorhizobium medicae WSM419	Alphaproteobacteria	6.82	61.1	347.508	0.228661	0.430636		0.157858	0.126286	1.87535
311	NC_004310	NC_004311	Brucella suis 1330	Alphaproteobacteria	3.32	57.3	347.411	0.228597	0.209576		0.157814	0.126251	1.87482
312	NC_009138	0	Herminiimonas arsenicoxydans	Betaproteobacteria	3.4	54.3	347.314	0.228533	0.214567		0.15777	0.126216	1.8743
313	NC_008508	NC_008509	Leptospira borgpetersenii serovar Hardjo-bovis L550	Spirochaetes	3.92	40.2	347.218	0.22847	0.247314		0.157726	0.126181	1.87378
314	NC_004842	0	Anaplasma marginale str. St. Maries	Alphaproteobacteria	1.2	49.8	347.122	0.228407	0.0756875		0.157682	0.126146	1.87326
315	NC_009135	0	Methanococcus maripaludis C5	Euryarchaeota	1.81	33	347.026	0.228344	0.11413		0.157639	0.126111	1.87275
316	NC_003317	NC_003318	Brucella melitensis 16M	Alphaproteobacteria	3.29	57.2	346.931	0.228281	0.207396		0.157596	0.126076	1.87223
317	NC_009438	0	Shewanella putrefaciens CN-32	Gammaproteobacteria	4.7	44.5	346.836	0.228219	0.296199		0.157552	0.126042	1.87172
318	NC_009437	0	Caldicellulosiruptor saccharolyticus DSM 8903	Other Bacteria	3	35.3	346.742	0.228157	0.189011		0.15751	0.126008	1.87121
319	NC_008698	0	Thermofilum pendens Hrk 5	Crenarchaeota	1.83	57.6	346.647	0.228095	0.115266		0.157467	0.125973	1.87071
320	NC_008596	0	Mycobacterium smegmatis str. MC2 155	Actinobacteria	7	67.4	346.554	0.228033	0.440788		0.157424	0.125939	1.8702
321	NC_003197	0	Salmonella typhimurium LT2	Gammaproteobacteria	4.99	52.2	346.46	0.227972	0.314134		0.157382	0.125905	1.8697
322	NC_006270	0	Bacillus licheniformis ATCC 14580	Firmicutes	4.2	46.2	346.367	0.22791	0.264331		0.15734	0.125872	1.86919
323	NC_008261	0	Clostridium perfringens ATCC 13124	Firmicutes	3.3	28.4	346.275	0.227849	0.207633		0.157298	0.125838	1.86869
324	NC_009659	0	Janthinobacterium sp. Marseille	Betaproteobacteria	4.1	54.2	346.183	0.227789	0.257899		0.157256	0.125804	1.8682
325	NC_002928	0	Bordetella parapertussis 12822	Betaproteobacteria	4.77	68.1	346.091	0.227728	0.299964		0.157214	0.125771	1.8677
326	NC_010003	0	Petrotoga mobilis SJ95	Thermotogae	2.2	34.1	345.999	0.227668	0.138312		0.157172	0.125738	1.86721
327	NC_008526	0	Lactobacillus casei ATCC 334	Firmicutes	2.93	46.6	345.908	0.227608	0.184157		0.157131	0.125705	1.86671
328	NC_009922	0	Alkaliphilus oremlandii OhILAs	Firmicutes	3.1	36.3	345.817	0.227548	0.194791		0.15709	0.125672	1.86622
329	NC_009725	0	Bacillus amyloliquefaciens FZB42	Firmicutes	3.9	46.5	345.727	0.227489	0.244996		0.157048	0.125639	1.86574
330	NC_003047	0	Sinorhizobium meliloti 1021	Alphaproteobacteria	6.74	62.2	345.636	0.227429	0.423292		0.157008	0.125606	1.86525
331	NC_007677	0	Salinibacter ruber DSM 13855	Bacteroidetes/Chlorobi	3.59	66.1	345.547	0.22737	0.225404		0.156967	0.125573	1.86476
332	NC_008530	0	Lactobacillus gasseri ATCC 33323	Firmicutes	1.9	35.3	345.457	0.227311	0.119264		0.156926	0.125541	1.86428
333	NC_008148	0	Rubrobacter xylanophilus DSM 9941	Actinobacteria	3.23	70.5	345.368	0.227253	0.202696		0.156886	0.125508	1.8638
334	NC_010084	NC_010086,NC_010087	Burkholderia multivorans ATCC 17616	Betaproteobacteria	6.99	66.7	345.279	0.227194	0.438539		0.156845	0.125476	1.86332
335	NC_003910	0	Colwellia psychrerythraea 34H	Gammaproteobacteria	5.37	38	345.191	0.227136	0.336817		0.156805	0.125444	1.86284
336	NC_007705	0	Xanthomonas oryzae pv. oryzae MAFF 311018	Gammaproteobacteria	4.9	63.7	345.103	0.227078	0.307259		0.156765	0.125412	1.86237
337	NC_009664	0	Kineococcus radiotolerans SRS30216	Actinobacteria	4.99	74.2	345.015	0.22702	0.312823		0.156725	0.12538	1.86189
338	NC_005303	0	Onion yellows phytoplasma OY-M	Firmicutes	0.86	27.7	344.927	0.226963	0.0538998		0.156685	0.125348	1.86142
339	NC_008800	0	Yersinia enterocolitica subsp. enterocolitica 8081	Gammaproteobacteria	4.67	47.2	344.84	0.226905	0.292614		0.156646	0.125317	1.86095
340	NC_002663	0	Pasteurella multocida subsp. multocida str. Pm70	Gammaproteobacteria	2.26	40.4	344.753	0.226848	0.141572		0.156606	0.125285	1.86048
341	NC_005085	0	Chromobacterium violaceum ATCC 12472	Betaproteobacteria	4.8	64.8	344.667	0.226791	0.300609		0.156567	0.125254	1.86002
342	NC_002678	0	Mesorhizobium loti MAFF303099	Alphaproteobacteria	7.6	62.5	344.581	0.226735	0.475845		0.156528	0.125222	1.85955
343	NC_007951	NC_007952,NC_007953	Burkholderia xenovorans LB400	Betaproteobacteria	9.77	62.6	344.495	0.226678	0.611559		0.156489	0.125191	1.85909
344	NC_008009	0	Acidobacteria bacterium Ellin345	Acidobacteria	5.7	58.4	344.409	0.226622	0.356706		0.15645	0.12516	1.85863
345	NC_010336	0	Francisella philomiragia subsp. philomiragia ATCC 25017	Gammaproteobacteria	2	32.6	344.324	0.226566	0.125129		0.156411	0.125129	1.85817
346	NC_000919	0	Treponema pallidum subsp. pallidum str. Nichols	Spirochaetes	1.14	52.8	344.239	0.22651	0.0713059		0.156373	0.125098	1.85771
347	NC_010520	0	Clostridium botulinum A3 str. Loch Maree	Firmicutes	4.27	28.1	344.154	0.226454	0.267019		0.156334	0.125067	1.85725
348	NC_004578	0	Pseudomonas syringae pv. tomato str. DC3000	Gammaproteobacteria	6.54	58.3	344.07	0.226399	0.40887		0.156296	0.125037	1.8568
349	NC_000961	0	Pyrococcus horikoshii OT3	Euryarchaeota	1.7	41.9	343.986	0.226343	0.106255		0.156258	0.125006	1.85634
350	NC_004917	0	Helicobacter hepaticus ATCC 51449	Epsilonproteobacteria	1.8	35.9	343.902	0.226288	0.112478		0.15622	0.124976	1.85589
351	NC_010525	0	Thermoproteus neutrophilus V24Sta	Crenarchaeota	1.8	59.9	343.819	0.226233	0.112451		0.156182	0.124945	1.85544
352	NC_007520	0	Thiomicrospira crunogena XCL-2	Gammaproteobacteria	2.4	43.1	343.735	0.226179	0.149898		0.156144	0.124915	1.85499
353	NC_000915	0	Helicobacter pylori 26695	Epsilonproteobacteria	1.67	38.9	343.653	0.226124	0.104279		0.156106	0.124885	1.85454
354	NC_004572	0	Tropheryma whipplei str. Twist	Actinobacteria	0.93	46.3	343.57	0.22607	0.0580576		0.156069	0.124855	1.8541
355	NC_007292	0	Candidatus Blochmannia pennsylvanicus str. BPEN	Gammaproteobacteria	0.79	29.6	343.488	0.226016	0.049306		0.156032	0.124825	1.85365
356	NC_008577	0	Shewanella sp. ANA-3	Gammaproteobacteria	5.28	47.9	343.406	0.225962	0.32946		0.155994	0.124795	1.85321
357	NC_009720	0	Xanthobacter autotrophicus Py2	Alphaproteobacteria	5.62	67.3	343.324	0.225908	0.350592		0.155957	0.124766	1.85277
358	NC_010622	NC_010623	Burkholderia phymatum STM815	Betaproteobacteria	8.7	62.3	343.243	0.225854	0.542602		0.15592	0.124736	1.85233
359	NC_009882	0	Rickettsia rickettsii str. 'Sheila Smith'	Alphaproteobacteria	1.3	32.5	343.162	0.225801	0.0810593		0.155883	0.124707	1.85189
360	NC_004829	0	Mycoplasma gallisepticum R	Firmicutes	1	31.5	343.081	0.225748	0.0623387		0.155847	0.124677	1.85146
361	NC_010816	0	Bifidobacterium longum DJO10A	Actinobacteria	2.41	60.2	343	0.225695	0.150201		0.15581	0.124648	1.85102
362	NC_008255	0	Cytophaga hutchinsonii ATCC 33406	Bacteroidetes/Chlorobi	4.4	38.8	342.92	0.225642	0.274162		0.155774	0.124619	1.85059
363	NC_007722	0	Erythrobacter litoralis HTCC2594	Alphaproteobacteria	3.05	63.1	342.84	0.225589	0.189999		0.155737	0.12459	1.85016
364	NC_004432	0	Mycoplasma penetrans HF-2	Firmicutes	1.36	25.7	342.76	0.225537	0.0847014		0.155701	0.124561	1.84973
365	NC_007503	0	Carboxydothermus hydrogenoformans Z-2901	Firmicutes	2.4	42	342.681	0.225485	0.149438		0.155665	0.124532	1.8493
366	NC_007604	0	Synechococcus elongatus PCC 7942	Cyanobacteria	2.75	55.4	342.602	0.225432	0.171192		0.155629	0.124503	1.84887
367	NC_003901	0	Methanosarcina mazei Go1	Euryarchaeota	4.1	41.5	342.523	0.225381	0.255173		0.155593	0.124475	1.84845
368	NC_010483	0	Thermotoga sp. RQ2	Thermotogae	1.9	46.2	342.444	0.225329	0.118224		0.155557	0.124446	1.84802
369	NC_006840	NC_006841	Vibrio fischeri ES114	Gammaproteobacteria	4.25	38.3	342.366	0.225277	0.264387		0.155522	0.124417	1.8476
370	NC_010505	0	Methylobacterium radiotolerans JCM 2831	Alphaproteobacteria	6.92	71	342.288	0.225226	0.430386		0.155486	0.124389	1.84718
371	NC_007908	0	Rhodoferax ferrireducens T118	Betaproteobacteria	4.97	59.6	342.21	0.225175	0.309037		0.155451	0.124361	1.84676
372	NC_004603	NC_004605	Vibrio parahaemolyticus RIMD 2210633	Gammaproteobacteria	5.17	45.4	342.132	0.225124	0.3214		0.155416	0.124333	1.84634
373	NC_002620	0	Chlamydia muridarum Nigg	Chlamydiae/Verrucomicrobia	1.08	40.3	342.055	0.225073	0.0671244		0.155381	0.124304	1.84592
374	NC_004337	0	Shigella flexneri 2a str. 301	Gammaproteobacteria	4.82	50.7	341.978	0.225022	0.299506		0.155346	0.124276	1.84551
375	NC_007794	0	Novosphingobium aromaticivorans DSM 12444	Alphaproteobacteria	4.23	65.1	341.901	0.224971	0.262786		0.155311	0.124249	1.84509
376	NC_006361	0	Nocardia farcinica IFM 10152	Actinobacteria	6.29	70.7	341.824	0.224921	0.390674		0.155276	0.124221	1.84468
377	NC_005125	0	Gloeobacter violaceus PCC 7421	Cyanobacteria	4.66	62	341.748	0.224871	0.28937		0.155241	0.124193	1.84427
378	NC_003155	0	Streptomyces avermitilis MA-4680	Actinobacteria	9.09	70.7	341.672	0.224821	0.564332		0.155207	0.124165	1.84386
379	NC_009937	0	Azorhizobium caulinodans ORS 571	Alphaproteobacteria	5.4	67.3	341.596	0.224771	0.335172		0.155172	0.124138	1.84345
380	NC_009615	0	Parabacteroides distasonis ATCC 8503	Bacteroidetes/Chlorobi	4.8	45.1	341.521	0.224721	0.297865		0.155138	0.12411	1.84304
381	NC_009033	0	Staphylothermus marinus F1	Crenarchaeota	1.6	35.7	341.446	0.224672	0.0992664		0.155104	0.124083	1.84263
382	NC_008048	0	Sphingopyxis alaskensis RB2256	Alphaproteobacteria	3.37	65.5	341.37	0.224622	0.209034		0.15507	0.124056	1.84223
383	NC_000909	0	Methanocaldococcus jannaschii DSM 2661	Euryarchaeota	1.76	31.3	341.296	0.224573	0.109145		0.155036	0.124029	1.84182
384	NC_002929	0	Bordetella pertussis Tohama I	Betaproteobacteria	4.09	67.7	341.221	0.224524	0.253583		0.155002	0.124001	1.84142
385	NC_008024	0	Streptococcus pyogenes MGAS10750	Firmicutes	1.94	38.3	341.147	0.224475	0.120255		0.154968	0.123974	1.84102
386	NC_007164	0	Corynebacterium jeikeium K411	Actinobacteria	2.48	61.4	341.073	0.224426	0.153695		0.154934	0.123948	1.84062
387	NC_009524	0	Psychrobacter sp. PRwf-1	Gammaproteobacteria	3.02	44.8	340.999	0.224378	0.18712		0.154901	0.123921	1.84022
388	NC_010080	0	Lactobacillus helveticus DPC 4571	Firmicutes	2.1	37.1	340.925	0.224329	0.130089		0.154867	0.123894	1.83983
389	NC_006368	0	Legionella pneumophila str. Paris	Gammaproteobacteria	3.64	38.3	340.852	0.224281	0.225439		0.154834	0.123867	1.83943
390	NC_005861	0	Candidatus Protochlamydia amoebophila UWE25	Chlamydiae/Verrucomicrobia	2.41	34.7	340.779	0.224233	0.149228		0.154801	0.123841	1.83904
391	NC_007947	0	Methylobacillus flagellatus KT	Betaproteobacteria	3	55.7	340.706	0.224185	0.185721		0.154768	0.123814	1.83864
392	NC_007955	0	Methanococcoides burtonii DSM 6242	Euryarchaeota	2.58	40.8	340.633	0.224137	0.159686		0.154735	0.123788	1.83825
393	NC_006177	0	Symbiobacterium thermophilum IAM 14863	Firmicutes	3.6	68.7	340.561	0.22409	0.222771		0.154702	0.123762	1.83786
394	NC_002967	0	Treponema denticola ATCC 35405	Spirochaetes	2.8	37.9	340.489	0.224042	0.173229		0.154669	0.123735	1.83747
395	NC_009714	0	Campylobacter hominis ATCC BAA-381	Epsilonproteobacteria	1.7	31.7	340.417	0.223995	0.105153		0.154636	0.123709	1.83708
396	NC_005364	0	Mycoplasma mycoides subsp. mycoides SC str. PG1	Firmicutes	1.2	24	340.345	0.223948	0.0742098		0.154604	0.123683	1.83669
397	NC_005090	0	Wolinella succinogenes DSM 1740	Epsilonproteobacteria	2.1	48.5	340.273	0.2239	0.12984		0.154571	0.123657	1.83631
398	NC_007109	0	Rickettsia felis URRWXCal2	Alphaproteobacteria	1.59	32.5	340.202	0.223854	0.0982868		0.154539	0.123631	1.83592
399	NC_007644	0	Moorella thermoacetica ATCC 39073	Firmicutes	2.6	55.8	340.131	0.223807	0.160687		0.154507	0.123605	1.83554
400	NC_008783	0	Bartonella bacilliformis KC583	Alphaproteobacteria	1.4	38.2	340.06	0.22376	0.0865057		0.154474	0.12358	1.83516
				Sum	1442.08		151975		100
1	genome size = total of all chromosomes and plasmids			average	146.165	42.0111
2	calculated using ni = a(log(i + 1))-b for 1 > i > M, and b=0.5
	The parameter a represents the abundance of the most abundant genotype, b is a parameter related to the evenness, and M is the number of different genotypes in the community.
